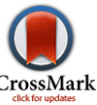

## Correction

# Correction: Mice with Chimeric Livers Are an Improved Model for Human Lipoprotein Metabolism

## The PLOS ONE Staff

The second author's name is incorrect. The correct name is Willscott Edward Naugler. The correct citation is: Ellis ECS, Naugler WE, Parini P, Mörk L-M, Jorns C, et al. (2013) Mice with Chimeric Livers Are an Improved Model for Human Lipoprotein Metabolism. PLoS ONE 8(11): e78550. doi:10.1371/journal.pone.0078550

## Reference

1. Ellis ECS, Nauglers S, Parini P, Mörk L-M, Jorns C, et al. (2013) Mice with Chimeric Livers Are an Improved Model for Human Lipoprotein Metabolism. PLoS ONE 8(11): e78550. doi:10.1371/journal.pone.0078550

---

**Citation:** The PLOS ONE Staff (2014) Correction: Mice with Chimeric Livers Are an Improved Model for Human Lipoprotein Metabolism. PLoS ONE 9(7): e103870. doi:10.1371/journal.pone.0103870

**Published:** July 23, 2014

**Copyright:** © 2014 The PLOS ONE Staff. This is an open-access article distributed under the terms of the Creative Commons Attribution License, which permits unrestricted use, distribution, and reproduction in any medium, provided the original author and source are credited.
